# Supplementary material
Source: publisher site journal article supplement (https://www.spandidos-publications.com/2428/downloadSupplementary)
Supplement: Supplementary file 1 [file downloadSupplementary]

## Sheet: Pathway
First Category	Second Category	GEO Number
Organismal Systems	Immune system	5
Environmental Information Processing	Signal transduction	4
Cellular Processes	Transport and catabolism	4
Human Diseases	Neurodegenerative diseases	4
Metabolism	Carbohydrate metabolism	3
Metabolism	Energy metabolism	3
Genetic Information Processing	Folding, sorting and degradation	3
Environmental Information Processing	Signaling molecules and interaction	3
Cellular Processes	Cell growth and death	3
Cellular Processes	Cellular community - eukaryotes	3
Human Diseases	Cancers: Overview	3
Human Diseases	Endocrine and metabolic diseases	3
Human Diseases	Infectious diseases: Bacterial	3
Cellular Processes	Cell motility	2
Organismal Systems	Digestive system	2
Human Diseases	Infectious diseases: Viral	2
Metabolism	Global and overview maps	1
Metabolism	Glycan biosynthesis and metabolism	1
Metabolism	Lipid metabolism	1
Metabolism	Metabolism of cofactors and vitamins	1
Metabolism	Xenobiotics biodegradation and metabolism	1
Genetic Information Processing	Replication and repair	1
Genetic Information Processing	Translation	1
Organismal Systems	Circulatory system	1
Organismal Systems	Endocrine system	1
Organismal Systems	Nervous system	1
Human Diseases	Cardiovascular diseases	1
Human Diseases	Immune diseases	1
Human Diseases	Substance dependence	1

## Sheet: KEGG
Table SVIII. KEGG Analysis of Proteins between GEO and control group.
pathway ID	Description	GEO UPDOWN numbers	GEO UPDOWN proteins
hsa05010	Alzheimer's disease	4	O95167(hsa:4696);Q99643(hsa:6391);P02649(hsa:348);P12074(hsa:1337)
hsa00190	Oxidative phosphorylation	3	O95167(hsa:4696);Q99643(hsa:6391);P12074(hsa:1337)
hsa04610	Complement and coagulation cascades	3	P04004(hsa:7448);P00734(hsa:2147);P00747(hsa:5340)
hsa04932	Non-alcoholic fatty liver disease (NAFLD)	3	O95167(hsa:4696);Q99643(hsa:6391);P12074(hsa:1337)
hsa05016	Huntington's disease	3	O95167(hsa:4696);Q99643(hsa:6391);P12074(hsa:1337)
hsa05012	Parkinson's disease	3	O95167(hsa:4696);Q99643(hsa:6391);P12074(hsa:1337)
hsa04080	Neuroactive ligand-receptor interaction	2	P00734(hsa:2147);P00747(hsa:5340)
hsa04210	Apoptosis	2	Q71U36(hsa:7846;hsa:84790;hsa:10376);A0A2R8YEA7(hsa:71;hsa:60)
hsa04810	Regulation of actin cytoskeleton	2	P00734(hsa:2147);A0A2R8YEA7(hsa:71;hsa:60)
hsa04530	Tight junction	2	Q71U36(hsa:7846;hsa:84790;hsa:10376);A0A2R8YEA7(hsa:71;hsa:60)
hsa04510	Focal adhesion	2	P04004(hsa:7448);A0A2R8YEA7(hsa:71;hsa:60)
hsa04145	Phagosome	2	Q71U36(hsa:7846;hsa:84790;hsa:10376);A0A2R8YEA7(hsa:71;hsa:60)
hsa05205	Proteoglycans in cancer	2	P04004(hsa:7448);A0A2R8YEA7(hsa:71;hsa:60)
hsa05130	Pathogenic Escherichia coli infection	2	Q71U36(hsa:7846;hsa:84790;hsa:10376);A0A2R8YEA7(hsa:71;hsa:60)
hsa05164	Influenza A	2	A0A2R8YEA7(hsa:71;hsa:60);P00747(hsa:5340)
hsa00562	Inositol phosphate metabolism	1	O00443(hsa:5286)
hsa00020	Citrate cycle (TCA cycle)	1	Q99643(hsa:6391)
hsa00040	Pentose and glucuronate interconversions	1	P08236(hsa:2990)
hsa01200	Carbon metabolism	1	Q99643(hsa:6391)
hsa00531	Glycosaminoglycan degradation	1	P08236(hsa:2990)
hsa00561	Glycerolipid metabolism	1	O14494(hsa:8611)
hsa00565	Ether lipid metabolism	1	O14494(hsa:8611)
hsa00564	Glycerophospholipid metabolism	1	O14494(hsa:8611)
hsa00600	Sphingolipid metabolism	1	O14494(hsa:8611)
hsa00860	Porphyrin and chlorophyll metabolism	1	P08236(hsa:2990)
hsa00983	Drug metabolism - other enzymes	1	P08236(hsa:2990)
hsa04141	Protein processing in endoplasmic reticulum	1	Q9GZP9(hsa:51009)
hsa04130	SNARE interactions in vesicular transport	1	O75558(hsa:8676)
hsa03018	RNA degradation	1	Q86TB9(hsa:219988)
hsa03420	Nucleotide excision repair	1	Q03468(hsa:2074)
hsa03010	Ribosome	1	Q6P1L8(hsa:64928)
hsa04015	Rap1 signaling pathway	1	A0A2R8YEA7(hsa:71;hsa:60)
hsa04151	PI3K-Akt signaling pathway	1	P04004(hsa:7448)
hsa04390	Hippo signaling pathway	1	A0A2R8YEA7(hsa:71;hsa:60)
hsa04070	Phosphatidylinositol signaling system	1	O00443(hsa:5286)
hsa04072	Phospholipase D signaling pathway	1	O14494(hsa:8611)
hsa04512	ECM-receptor interaction	1	P04004(hsa:7448)
hsa04216	Ferroptosis	1	A6NCE7(hsa:81631;hsa:643246)
hsa04540	Gap junction	1	Q71U36(hsa:7846;hsa:84790;hsa:10376)
hsa04520	Adherens junction	1	A0A2R8YEA7(hsa:71;hsa:60)
hsa04142	Lysosome	1	P08236(hsa:2990)
hsa04144	Endocytosis	1	Q8N6H7(hsa:84364)
hsa04260	Cardiac muscle contraction	1	P12074(hsa:1337)
hsa04972	Pancreatic secretion	1	O00194(hsa:5874)
hsa04975	Fat digestion and absorption	1	O14494(hsa:8611)
hsa04921	Oxytocin signaling pathway	1	A0A2R8YEA7(hsa:71;hsa:60)
hsa04919	Thyroid hormone signaling pathway	1	A0A2R8YEA7(hsa:71;hsa:60)
hsa04670	Leukocyte transendothelial migration	1	A0A2R8YEA7(hsa:71;hsa:60)
hsa04666	Fc gamma R-mediated phagocytosis	1	O14494(hsa:8611)
hsa04611	Platelet activation	1	A0A2R8YEA7(hsa:71;hsa:60)
hsa04723	Retrograde endocannabinoid signaling	1	O95167(hsa:4696)
hsa05231	Choline metabolism in cancer	1	O14494(hsa:8611)
hsa05410	Hypertrophic cardiomyopathy (HCM)	1	A0A2R8YEA7(hsa:71;hsa:60)
hsa05412	Arrhythmogenic right ventricular cardiomyopathy (ARVC)	1	A0A2R8YEA7(hsa:71;hsa:60)
hsa05414	Dilated cardiomyopathy	1	A0A2R8YEA7(hsa:71;hsa:60)
hsa05416	Viral myocarditis	1	A0A2R8YEA7(hsa:71;hsa:60)
hsa05418	Fluid shear stress and atherosclerosis	1	A0A2R8YEA7(hsa:71;hsa:60)
hsa05322	Systemic lupus erythematosus	1	Q9P0M6(hsa:55506)
hsa05150	Staphylococcus aureus infection	1	P00747(hsa:5340)
hsa05132	Salmonella infection	1	A0A2R8YEA7(hsa:71;hsa:60)
hsa05131	Shigellosis	1	A0A2R8YEA7(hsa:71;hsa:60)
hsa05100	Bacterial invasion of epithelial cells	1	A0A2R8YEA7(hsa:71;hsa:60)
hsa05110	Vibrio cholerae infection	1	A0A2R8YEA7(hsa:71;hsa:60)
hsa05034	Alcoholism	1	Q9P0M6(hsa:55506)
